# Supplementary material for: Detection of Antibiotic Resistant Staphylococcus aureus from Milk: A Public Health Implication
Source: MDPI journal article supplement (doi:10.3390/ijerph120910254), 2015-08-25
Supplement: s2 [file s2]

*Supplementary Information*

Detection of Antibiotic Resistant *Staphylococcus aureus* from Milk: A Public Health Implication

**
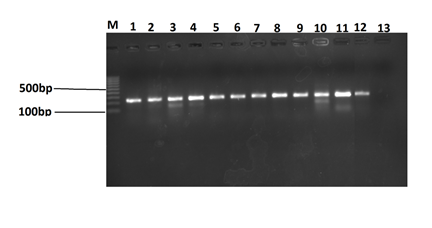
**

**Figure S1.** Agarose gel electrophoresis analysis for the 16rRNA gene in *S. aureus* isolates. Lane M = 100bp DNA maker, Lanes 1–11 = *S. aureus* isolates,
lane 12 = *S. aureus* 25923 (positive control), lane 13 = negative control.

**
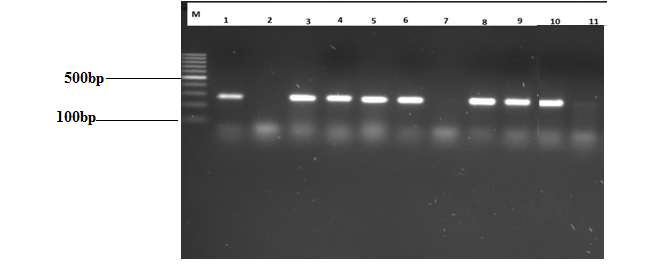
**

**Figure S2.** Agarose gel electrophoresis analysis for the *nuc* gene in *S. aureus* isolates. Lane M = 100bp DNA maker; Lanes 1, 3, 4, 5, 6, 8 and 9 = *S. aureus* isolates; lanes 2 and 7 = nuc negative isolates; lane 10 = *S. aureus* 25923 (positive control); lane 11 = negative control.

**
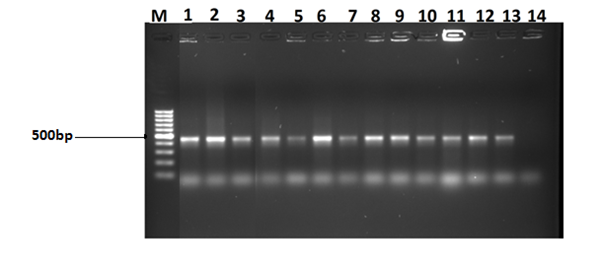
**

**Figure S3.** Agarose gel electrophoresis analysis for the *sec* gene in *S. aureus* isolates.
Lane M = 100bp DNA maker, Lanes 1–13 = *S. aureus* isolates, lane 14 = negative control.

| **Isolate Number** | **Score Value** | **Identity based on MALDI-TOF MS analysis** | **Score Value** | **Identity based on MALDI-TOF MS analysis** |
| --- | --- | --- | --- | --- |
| **Best Match** | **Second Best Match** |
| **1RO3** | 2.234 | *Staphylococcus aureus* | 2.073 | *Staphylococcus aureus* |
|  | | | | |
| **1RO4** | 2.097 | *Staphylococcus aureus* | 1.936 | *Staphylococcus aureus* |
|  | | | | |

**Figure S4.** A representative mass spectral profiles of *S. aureus* isolated from milk obtained from Rooigrond.

© 2015 by the authors; licensee MDPI, Basel, Switzerland. This article is an open access article distributed under the terms and conditions of the Creative Commons Attribution license (http://creativecommons.org/licenses/by/4.0/).
